# Supplementary material for: Facile synthesis of rare earth-doped CeF3 two-dimensional nanosheets and their application in ratiometric luminescence temperature sensing
Source: Royal Society of Chemistry journal article supplement (doi:10.1039/d2ce00550f), 2022-01-01
Supplement: d2ce00550f1.pdf [file d2ce00550f1.pdf]

Electronic Supplementary Information (ESI) for CrystEngComm

# Facile synthesis of rare earth-doped CeF<sub>3</sub> two-dimensional nanosheets and their application in ratiometric luminescence temperature sensing

Ran An,<sup>a</sup> Yuan Liang,<sup>acd</sup> Pengye Du,<sup>ac</sup> Pengpeng Lei<sup>a,\*</sup> and Hongjie Zhang<sup>abc,\*</sup>

<sup>a</sup>State Key Laboratory of Rare Earth Resource Utilization, Changchun Institute of Applied Chemistry, Chinese Academy of Sciences, 5625 Renmin Street, Changchun 130022, China

<sup>b</sup>Department of Chemistry, Tsinghua University, Beijing 100084, China

<sup>c</sup>University of Science and Technology of China, Hefei 230026, China

<sup>d</sup>Ganjiang Innovation Academy, Chinese Academy of Sciences, Ganzhou, Jiangxi 341000, China

\*Corresponding authors. Tel.: +86 431 85262127; fax: +86 431 85698041.

E-mail addresses: leipp@ciac.ac.cn (P. P. Lei), hongjie@ciac.ac.cn (H. J. Zhang).

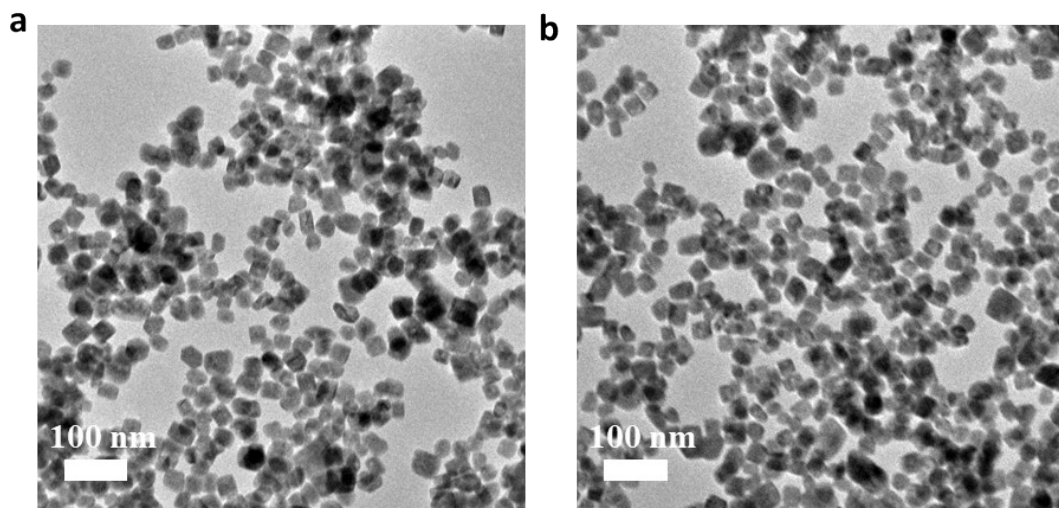

**Fig. S1** Transmission electron microscopy (TEM) images of  $\text{CeF}_3$ :20% Gd, 20% Tb formed by adding of different amounts of  $\text{H}_2\text{O}$  to the reaction solvent: (a) 16 mL, (b) 18 mL.

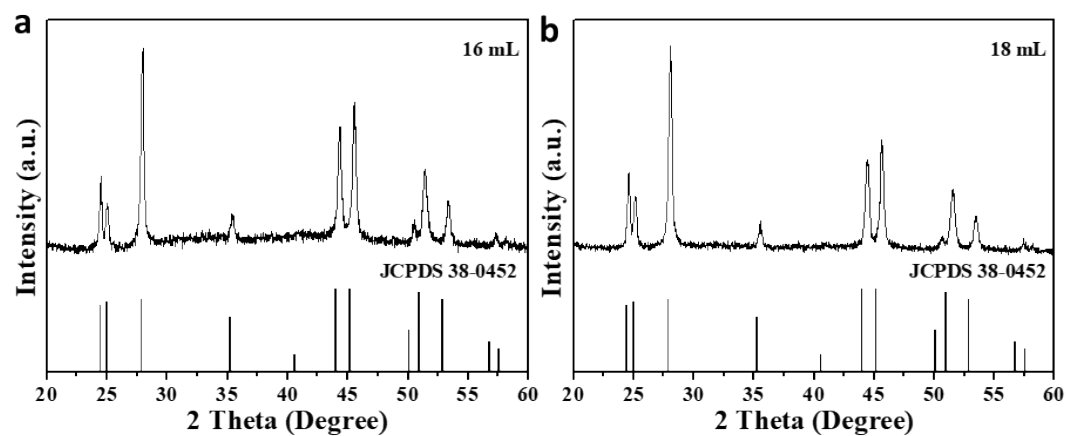

**Fig. S2** X-ray diffraction (XRD) patterns of CeF<sub>3</sub>:20% Gd, 20% Tb formed by adding of different amounts of H<sub>2</sub>O to the reaction solvent: (a) 16 mL, (b) 18 mL.

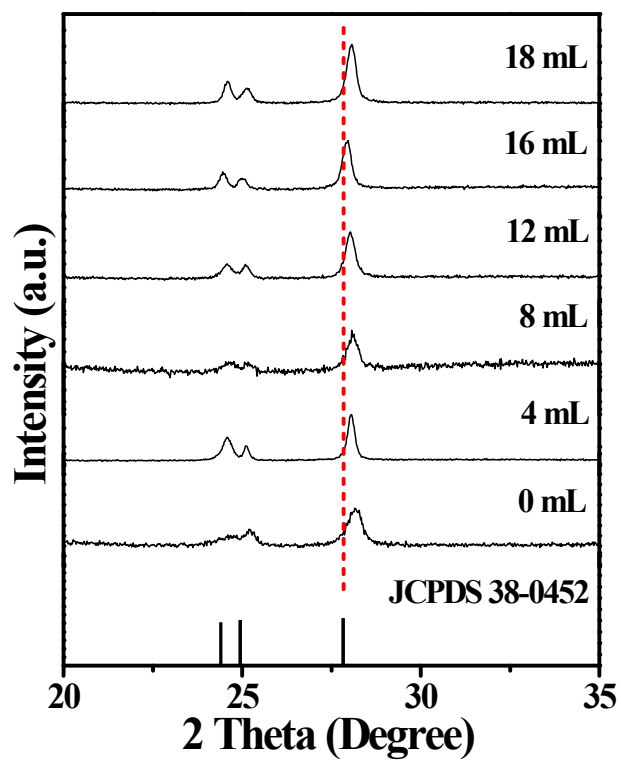

**Fig. S3** The magnified XRD patterns of CeF<sub>3</sub>:20% Gd, 20% Tb formed by adding of different amounts of H<sub>2</sub>O to the reaction solvent.

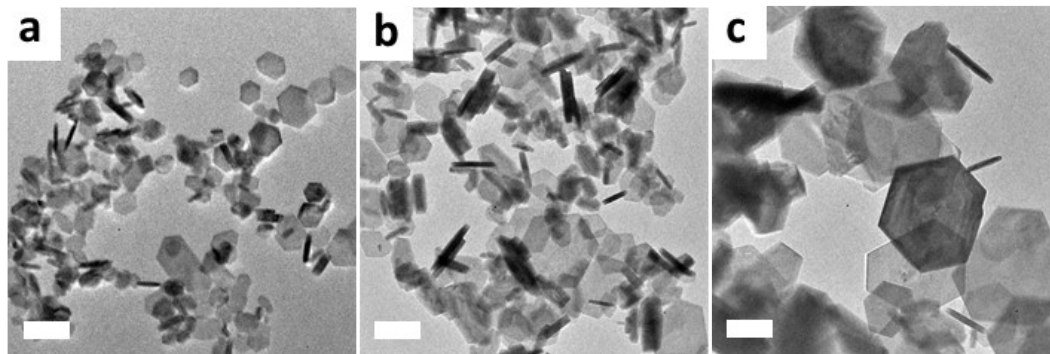

**Fig. S4** TEM images of  $\text{CeF}_3\text{:X\% Gd, 20\% Tb}$  formed in the presence of 4 mL  $\text{H}_2\text{O}$  in the reaction solvent. X is (a) 0, (b) 10, and (c) 30. Scale bar: 100 nm.

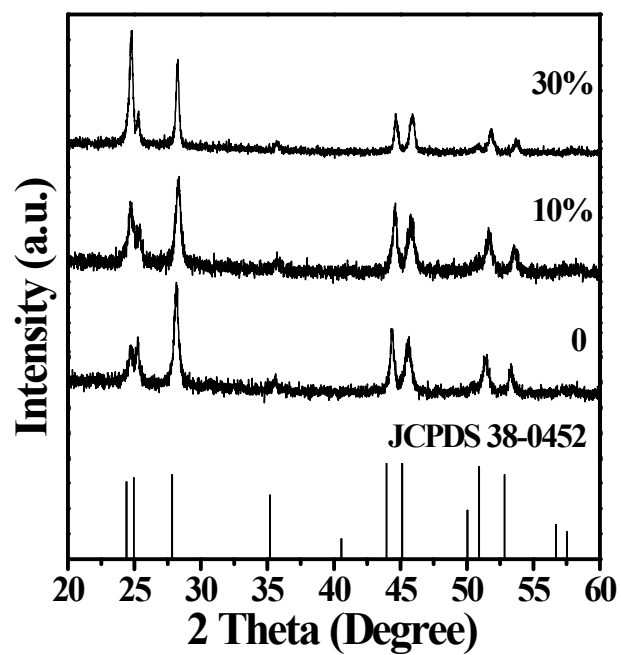

**Fig. S5** XRD patterns of CeF<sub>3</sub>:X% Gd, 20% Tb formed in the presence of 4 mL H<sub>2</sub>O in the reaction solvent. X is 0, 10, and 30.

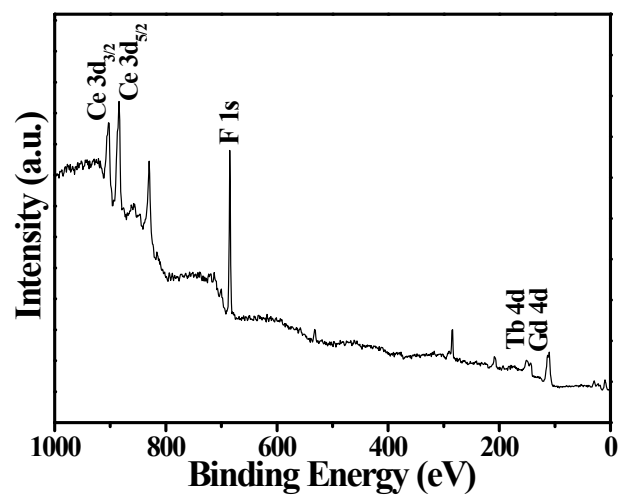

**Fig. S6** X-ray photoelectron spectroscopy (XPS) survey spectra of CeF<sub>3</sub>:20% Gd, 30% Tb 2D nanosheets formed in the presence of 4 mL H<sub>2</sub>O in the reaction solvent.

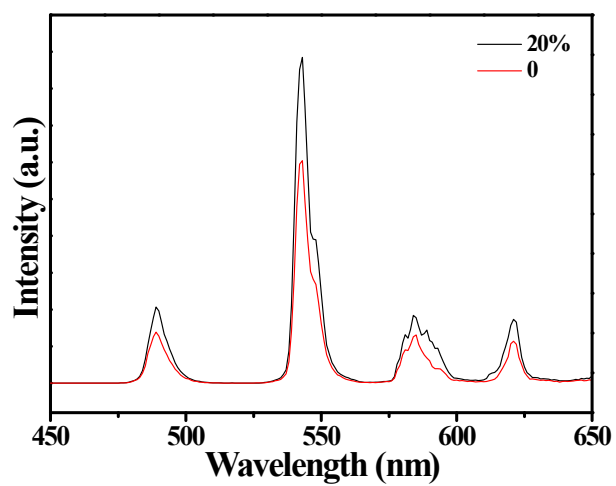

**Fig. S7** Emission spectra of CeF<sub>3</sub>:X% Gd, 30% Tb (X = 0, 20) under excitation at 254 nm.



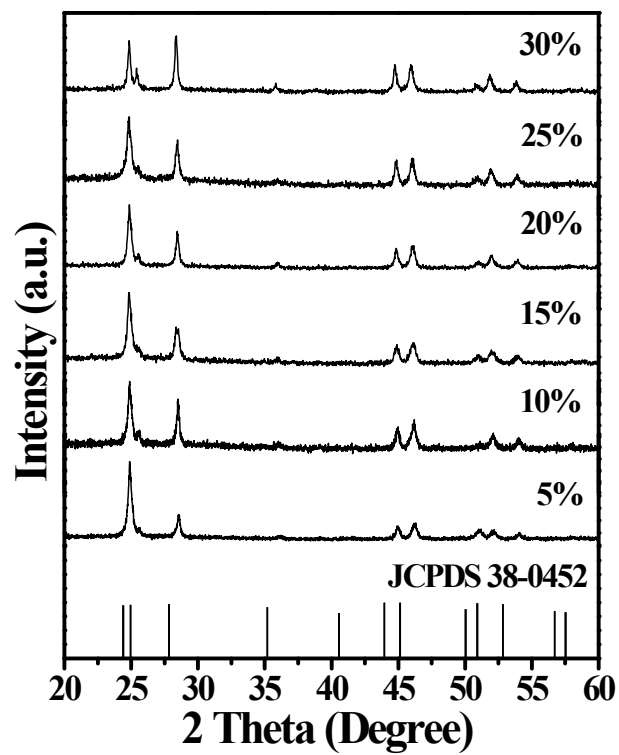

**Fig. S8** XRD patterns of CeF<sub>3</sub>:20% Gd, (30-X)% Tb, X% Eu (X = 5, 10, 15, 20, 25, and 30 ) formed in the presence of 4 mL H<sub>2</sub>O in the reaction solvent.

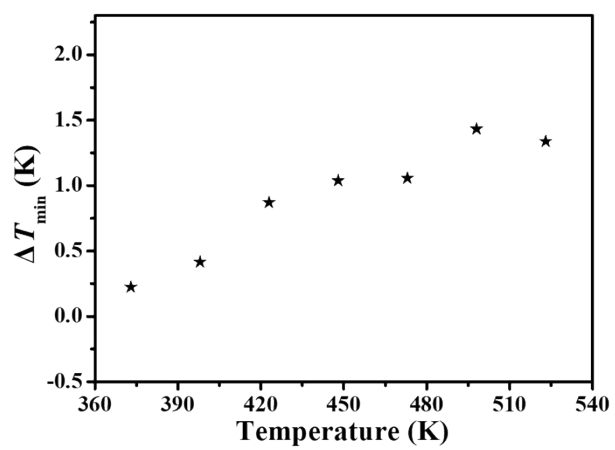

**Fig. S9** Temperature uncertainty ( $\Delta T_{min}$ ) of CeF<sub>3</sub>:20% Gd, 25% Tb, 5% Eu in the temperature range of 373 to 523 K.

**Table S1.** The actual doping percentages of Ce, Gd, Tb, and Eu in CeF<sub>3</sub>:20% Gd, (30-X)% Tb, X% Eu (X = 0, 5, 10, 15, 20, and 25) were quantified by inductively coupled plasma optical emission spectrometer technique.

|        | Ce (%) | Gd (%) | Tb (%) | Eu (%) |
|--------|--------|--------|--------|--------|
| X = 0  | 50.46  | 18.86  | 30.70  |        |
| X = 5  | 49.46  | 19.17  | 25.88  | 5.49   |
| X = 10 | 49.79  | 18.88  | 20.48  | 10.86  |
| X = 15 | 50.80  | 18.94  | 15.32  | 14.94  |
| X = 20 | 50.77  | 18.71  | 10.46  | 20.06  |
| X = 25 | 50.40  | 18.66  | 4.91   | 26.03  |
